# Supplementary material
Source: Springer Nature journal article supplement (https://www.springermedizin.de/resource/supplementary/12889_2012_4802_MOESM2_ESM.pdf/9493674)

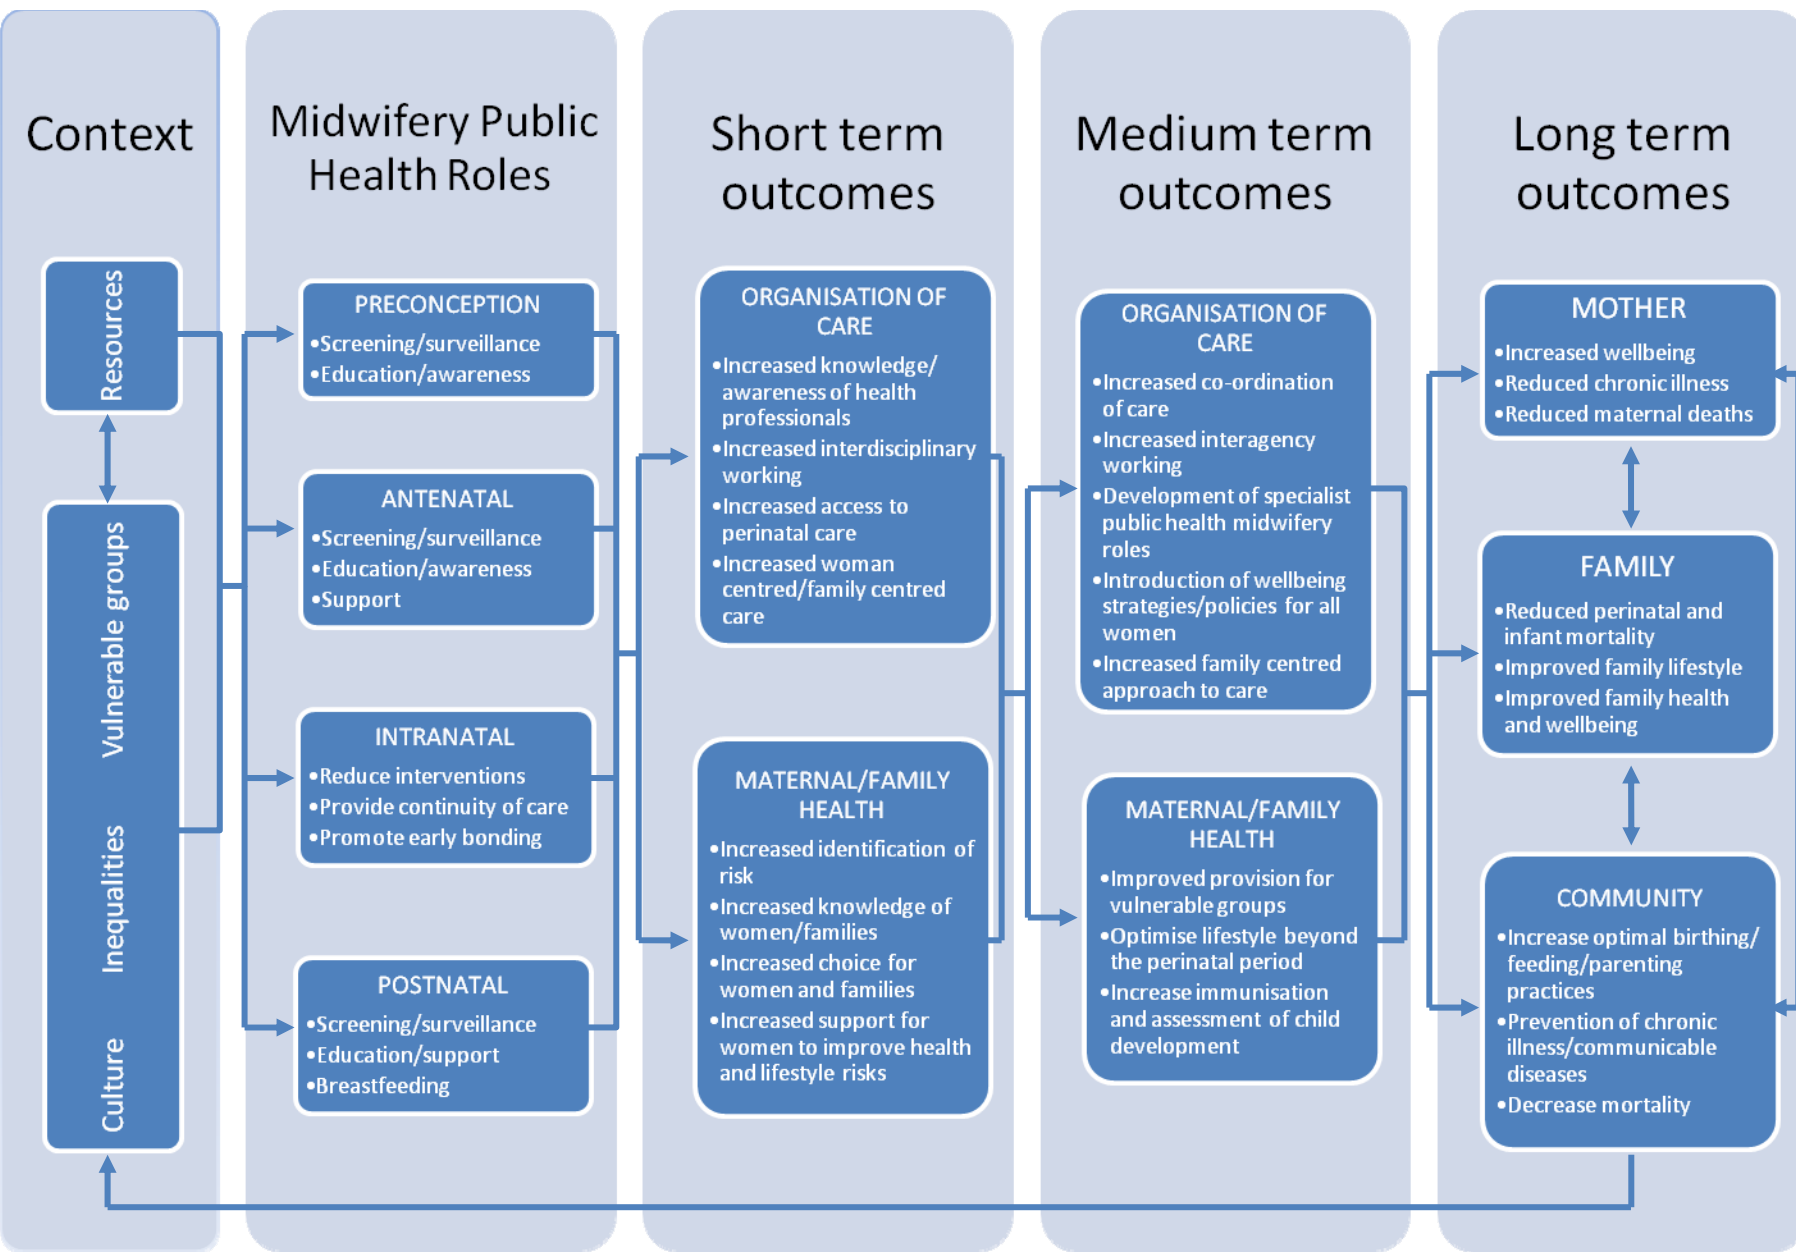

Supplement: MOESM2 [file 9493674]
